# Supplementary material for: Country uptake of WHO recommendations on differentiated HIV testing services approaches: a global policy review
Source: PubMed Central journal article supplement — BMJ Open. 2024 Mar 13;14(3):e058098. doi: 10.1136/bmjopen-2021-058098 (PMC10941124; doi:10.1136/bmjopen-2021-058098), 2024-03-13
Supplement: bmjopen-2021-058098supp002.pdf [file bmjopen-2021-058098supp002.pdf]

|                                                                                   |                                         |
|-----------------------------------------------------------------------------------|-----------------------------------------|
|  | Compliant                               |
|  | Not compliant                           |
|  | Unclear                                 |
|  | Concentrated epidemis                   |
|  | Generalised epidemic                    |
|  | Not reccomended in this country setting |

| WHO region | Country        | Year |
|------------|----------------|------|
| AFR        | Angola         | 2015 |
| AMR        | Argentina      | 2015 |
| WPR        | Australia      | 2017 |
| AFR        | Benin          | 2017 |
| AFR        | Botswana       | 2016 |
| EUR        | Bulgaria       | 2017 |
| AFR        | Cameroon       | 2018 |
| EUR        | Denmark        | 2015 |
| WPR        | China          | 2015 |
| EUR        | France         | 2017 |
| AFR        | Côte d'Ivoire  | 2016 |
| EUR        | Croatia        | 2017 |
| AMR        | Guatamala      | 2018 |
| EUR        | Czech Republic | 2018 |
| SEAR       | India          | 2015 |
| EMR        | Egypt          | 2015 |
| EUR        | Italy          | 2016 |
| EUR        | Kazakhstan     | 2015 |
| AFR        | Ethiopia       | 2017 |
| EUR        | Finland        | 2018 |
| AFR        | Ghana          | 2017 |
| EUR        | Georgia        | 2016 |
| EUR        | Lithuania      | 2017 |
| EUR        | Germany        | 2015 |
| AMR        | Haiti          | 2015 |
| AFR        | Guinea         | 2018 |
| AFR        | Kenya          | 2015 |
| EUR        | Ireland        | 2015 |
| AFR        | Lesotho        | 2016 |
| AFR        | Liberia        | 2015 |
| EUR        | Luxembourg     | 2017 |
| EUR        | Netherlands    | 2017 |
| AFR        | Malawi         | 2016 |
| WPR        | Malaysia       | 2015 |
| AFR        | Mali           | 2017 |
| EUR        | Russia         | 2016 |
| AFR        | Mozambique     | 2015 |
| SEAR       | Myanmar        | 2017 |
| AFR        | Nigeria        | 2016 |

|      |                          |      |
|------|--------------------------|------|
| EMR  | Oman                     | 2015 |
| EMR  | Pakistan                 | 2017 |
| EUR  | Romania                  | 2017 |
| AFR  | Rwanda                   | 2016 |
| AFR  | Senegal                  | 2017 |
| AFR  | Sierra Leone             | 2017 |
| EUR  | Slovenia                 | 2017 |
| EUR  | Slovakia                 | 2017 |
| EMR  | Somalia                  | 2017 |
| EUR  | Sweden                   | 2017 |
| AFR  | South Africa             | 2016 |
| EMR  | South Sudan              | 2017 |
| SEAR | Sri Lanka                | 2016 |
| AMR  | Cayman Islands           | 2015 |
| SEAR | Thailand                 | 2017 |
| EMR  | Sudan                    | 2016 |
| EUR  | Ukraine                  | 2016 |
| AFR  | Swaziland                | 2018 |
| AFR  | Tanzania                 | 2017 |
| AFR  | Uganda                   | 2016 |
| EUR  | United Kingdom           | 2016 |
| AMR  | United States of America | 2017 |
| WPR  | Vietam                   | 2018 |
| WPR  | Nauru                    | 2015 |
| AFR  | Zambia                   | 2016 |
| AFR  | Zimbabwe                 | 2018 |

## Extraction Tool (Coun

| HTS APPROCHES           |                            |                   |                      |
|-------------------------|----------------------------|-------------------|----------------------|
| Community-based testing | provider assisted referral | HIV- self testing | Pre-test information |
| u                       | u                          | u                 | u                    |
| y                       | n                          | n                 | u                    |
| y                       | y                          | n                 | n                    |
| y                       | y                          | u                 | y                    |
| y                       | n                          | n                 | n                    |
| y                       | n                          | n                 | n                    |
| y                       | y                          | exploring         | n                    |
| n                       | n                          | n                 | n                    |
| y                       | n                          | y                 | n                    |
| n                       | n                          | y                 | n                    |
| y                       | n                          | y                 | n                    |
| y                       | n                          | n                 | n                    |
| n                       | n                          | n                 | n                    |
| y                       | n                          | y                 | n                    |
| n                       | n                          | n                 | n                    |
| n                       | n                          | n                 | n                    |
| y                       | n                          | n                 | y                    |
| y                       | n                          | n                 | n                    |
| y                       | y                          | y                 | u                    |
| y                       | n                          | n                 | n                    |
| n                       | n                          | n                 | n                    |
| y                       | n                          | n                 | n                    |
| y                       | y                          | n                 | n                    |
| y                       | n                          | n                 | n                    |
| y                       | n                          | y                 | y                    |
| y                       | y                          | n                 | n                    |
| y                       | n                          | y                 | n                    |
| n                       | n                          | u                 | n                    |
| y                       | n                          | n                 | n                    |
| n                       | n                          | y                 | n                    |
| y                       | n                          | y                 | n                    |
| y                       | n                          | n                 | n                    |
| y                       | y                          | y                 | n                    |
| n                       | n                          | n                 | n                    |
| y                       | n                          | n                 | n                    |
| y                       | y                          | n                 | n                    |
| y                       | y                          | y                 | y                    |

|   |   |   |   |
|---|---|---|---|
| y | n | n | y |
| y | y | y | y |
| y | n | y | y |
| y | n | n | n |
| y | y | y | n |
| y | n | n | y |
| y | n | y | n |
| n | n | n | n |
| y | n | y | y |
| n | n | n | n |
| y | y | y | y |
| y | n | y | y |
| y | n | n | y |
| n | n | n | n |
| n | n | n | n |
| y | n | n | y |
| n | n | n | u |
| y | y | y | y |
| y | y | n | y |
| y | n | y | n |
| y | y | y | y |
| y | n | n | n |
| y | u | y | y |
| n | n | n | n |
| y | n | y | y |
| y | n | y | y |

## try uptake of WHO recommendations on differentiate

| HTS COMPONENTS       |                       |                          |                        |
|----------------------|-----------------------|--------------------------|------------------------|
| Pre-test counselling | post-test counselling | Lay provider HIV testing | Rapid Diagnostic tests |
| y                    | u                     | u                        | y                      |
| y                    | y                     | y                        | y                      |
| n                    | n                     | u                        | y                      |
| n                    | y                     | y                        | y                      |
| y                    | y                     | y                        | y                      |
| n                    | n                     | n                        | n                      |
| y                    | y                     | n                        | u                      |
| n                    | n                     | n                        | n                      |
| n                    | y                     | n                        | y                      |
| n                    | n                     | n                        | y                      |
| y                    | y                     | y                        | y                      |
| y                    | y                     | n                        | y                      |
| n                    | n                     | n                        | n                      |
| n                    | n                     | n                        | y                      |
| y                    | y                     | n                        | n                      |
| y                    | y                     | n                        | y                      |
| n                    | n                     | n                        | n                      |
| y                    | y                     | n                        | n                      |
| n                    | y                     | y                        | y                      |
| n                    | n                     | n                        | n                      |
| y                    | y                     | y                        | y                      |
| n                    | n                     | n                        | n                      |
| n                    | n                     | n                        | y                      |
| n                    | n                     | n                        | n                      |
| y                    | y                     | y                        | y                      |
| n                    | n                     | n                        | y                      |
| y                    | y                     | y                        | y                      |
| n                    | n                     | n                        | n                      |
| y                    | y                     | y                        | y                      |
| y                    | y                     | y                        | y                      |
| n                    | n                     | n                        | y                      |
| n                    | n                     | n                        | y                      |
| y                    | y                     | y                        | y                      |
| n                    | n                     | y                        | y                      |
| y                    | y                     | y                        | n                      |
| n                    | n                     | n                        | n                      |
| y                    | y                     | n                        | y                      |
| n                    | n                     | y                        | y                      |
| n                    | y                     | y                        | y                      |

|   |   |   |   |
|---|---|---|---|
| n | y | n | y |
| n | y | y | y |
| n | y | n | y |
| y | y | y | y |
| y | y | n | n |
| n | y | y | y |
| n | n | n | y |
| n | n | n | n |
| n | y | y | y |
| n | n | n | n |
| n | y | y | y |
| n | n | n | n |
| y | n | y | y |
| y | y | n | n |
| n | n | n | n |
| y | y | y | y |
| u | n | n | y |
| n | y | y | y |
| n | y | y | y |
| y | n | y | y |
| n | y | y | y |
| n | n | n | n |
| n | y | y | u |
| n | n | n | y |
| n | y | y | y |
| n | y | u | y |

### d HIV testing services approaches: a global policy review)

| POPULATION SPECIFIC FACILITY BASED HIV TESTING |                |                 |                      |
|------------------------------------------------|----------------|-----------------|----------------------|
| Adolscents                                     | Pregnant women | Key Populations | Infants and Children |
| y                                              | y              | u               | y                    |
| y                                              | y              | y               | n                    |
| n                                              | y              | y               | y                    |
| n                                              | y              | y               | y                    |
| y                                              | y              | n               | y                    |
| y                                              | y              | y               | u                    |
| y                                              | y              | y               | y                    |
| n                                              | n              | y               | n                    |
| n                                              | y              | n               | y                    |
| n                                              | y              | y               | n                    |
| y                                              | y              | y               | y                    |
| y                                              | y              | y               | n                    |
| n                                              | y              | n               | y                    |
| n                                              | y              | n               | n                    |
| n                                              | n              | n               | y                    |
| n                                              | y              | y               | y                    |
| n                                              | y              | y               | y                    |
| n                                              | y              | n               | n                    |
| y                                              | y              | y               | y                    |
| n                                              | y              | y               | u                    |
| y                                              | y              | y               | y                    |
| n                                              | y              | y               | u                    |
| n                                              | n              | n               | n                    |
| n                                              | n              | y               | n                    |
| y                                              | y              | y               | y                    |
| n                                              | y              | y               | y                    |
| y                                              | y              | y               | y                    |
| n                                              | y              | y               | n                    |
| y                                              | y              | y               | y                    |
| n                                              | y              | n               | y                    |
| n                                              | y              | y               | n                    |
| y                                              | y              | n               | n                    |
| y                                              | y              | y               | y                    |
| y                                              | y              | y               | y                    |
| y                                              | y              | y               | y                    |
| n                                              | n              | n               | n                    |
| y                                              | y              | y               | y                    |
| y                                              | y              | y               | y                    |
| y                                              | y              | y               | y                    |

|   |   |   |   |
|---|---|---|---|
| n | y | y | y |
| y | y | y | y |
| y | y | y | y |
| y | y | y | y |
| n | y | y | n |
| y | y | y | y |
| n | y | y | n |
| n | y | y | y |
| y | y | y | y |
| n | n | n | n |
| y | y | y | y |
| y | y | y | y |
| y | y | y | y |
| n | n | n | n |
| n | n | n | n |
| n | y | y | y |
| n | y | n | n |
| y | y | y | y |
| y | y | y | y |
| y | y | y | y |
| n | y | y | y |
| n | n | y | n |
| n | n | y | y |
| n | y | n | n |
| y | y | y | y |
| y | y | y | y |



| EPIDEMIC SPECIFIC |                                                                   |                                                                                              |
|-------------------|-------------------------------------------------------------------|----------------------------------------------------------------------------------------------|
| Epidemic type     | Community-based testing in concentrated and generalised epidemics | Facility based testing for all adolescents in all clinical settings in generalised epidemics |
| C                 | u                                                                 |                                                                                              |
| C                 |                                                                   |                                                                                              |
| C                 |                                                                   |                                                                                              |
| C                 | y                                                                 |                                                                                              |
| SC                | y                                                                 | n                                                                                            |
| SC                | y                                                                 | u                                                                                            |
| SC                | y                                                                 | y                                                                                            |
| C                 | n                                                                 |                                                                                              |
| C                 |                                                                   |                                                                                              |
| C                 | n                                                                 |                                                                                              |
| SC                | y                                                                 | y                                                                                            |
| C                 |                                                                   |                                                                                              |
| C                 | n                                                                 |                                                                                              |
| C                 |                                                                   |                                                                                              |
| C                 | n                                                                 |                                                                                              |
| C                 | n                                                                 |                                                                                              |
| C                 | y                                                                 |                                                                                              |
| C                 |                                                                   |                                                                                              |
| C                 | y                                                                 |                                                                                              |
| C                 | n                                                                 |                                                                                              |
| C                 | y                                                                 |                                                                                              |
| SC                | y                                                                 | y                                                                                            |
| SC                | y                                                                 | y                                                                                            |
| SC                | y                                                                 | y                                                                                            |
| SC                | n                                                                 | n                                                                                            |
| C                 |                                                                   |                                                                                              |
| C                 | n                                                                 |                                                                                              |
| SC                | y                                                                 | y                                                                                            |
| C                 | y                                                                 |                                                                                              |
| C                 | y                                                                 |                                                                                              |
| C                 | n                                                                 |                                                                                              |
| SC                | y                                                                 | y                                                                                            |
| SC                | y                                                                 | y                                                                                            |
| SC                | y                                                                 | y                                                                                            |

|    |   |   |
|----|---|---|
|    |   |   |
| C  | y |   |
|    |   |   |
| SC | y | y |
| C  | y |   |
| SC | y | y |
|    |   |   |
|    |   |   |
| SC | y | y |
|    |   |   |
| SC | y | y |
| SC | y | y |
|    |   |   |
|    |   |   |
| C  | n |   |
|    |   |   |
| C  | u |   |
| SC | y | y |
| SC | y | y |
| SC | y | y |
| C  | y |   |
| C  | y |   |
| C  | y |   |
|    |   |   |
| SC | y | y |
| SC | y | y |

| Facility based testing for those with symptoms in concentrated epidemics |
|--------------------------------------------------------------------------|
| u                                                                        |
| y                                                                        |
|                                                                          |
| y                                                                        |
|                                                                          |
|                                                                          |
| y                                                                        |
|                                                                          |
| y                                                                        |
|                                                                          |
|                                                                          |
| u                                                                        |
|                                                                          |
|                                                                          |
| y                                                                        |
| y                                                                        |
| y                                                                        |
|                                                                          |
|                                                                          |
| u                                                                        |
| y                                                                        |
| u                                                                        |
|                                                                          |
|                                                                          |
|                                                                          |
|                                                                          |
|                                                                          |
| y                                                                        |
|                                                                          |
| y                                                                        |
| y                                                                        |
| y                                                                        |
|                                                                          |
|                                                                          |
|                                                                          |

|   |
|---|
|   |
| y |
|   |
|   |
| y |
|   |
|   |
|   |
|   |
|   |
|   |
|   |
| y |
|   |
| u |
|   |
|   |
|   |
|   |
| y |
| y |
| u |
|   |
|   |
|   |
